# Supplementary material for: Preventive Antibiotic Prescribing Habits among Professionals Dedicated to Oral Implantology: An Observational Study
Source: MDPI journal article supplement (doi:10.3390/antibiotics10030301), 2021-03-14
Supplement: s1 [file s1]

## File S1. Questionnaire

### Preventive antibiotic prescribing habits among professionals dedicated to Oral Implantology: An observational study - Questionnaire

**Block I: General variables related to the population surveyed** (demographic, academic, professional and experience data of the respondent).

---

1. **Gender:**
  - Male.
  - Female.
2. **Age (years):**
  - ≤ 30 years.
  - 31-40 years.
  - 41-50 years.
  - 51-60 years.
  - > 60 years.
3. **Education levels:**
  - Graduate in Dentistry.
  - Degree in Dentistry.
  - Stomatologist.
  - Maxillofacial surgeon
4. **Level of postgraduate training achieved:**
  - Non-accredited training courses (clinical placements, commercial firm courses, etc).
  - Postgraduate university courses related to Oral Implantology.
  - Student of any university master's degree related to Oral Implantology (Oral Surgery, Oral Implantology, Periodontics or combinations of these).
  - A completed master's degree course related to Oral Implantology.
5. **Years of experience placing implants:**
  - ≤ 5 years.
  - 6-15 years.
  - 16-20 years.
  - > 20 years.
6. **Approximate average number of implants placed per year:**
  - ≤ 50.
  - 51-100.
  - > 100.
7. **Are you dedicated exclusively to the placement of implants?**
  - Yes.
  - No.

**Block II: Frequency of prescription of different antibiotic regimens and regimens of choice according to different scenarios** (implant procedures and patients with risk or special conditions).

---

1. **In healthy patients, do you prescribe preventive antibiotics in dental implant surgeries?**
  - Always.
  - Sometimes.
  - Never.
2. **Please specify whether you prescribe preventive antibiotics in the following procedures in healthy patients:**
  - 2.1. **Immediate implants:**
    - I do not normally prescribe antibiotics for this procedure.
    - I prescribe antibiotics preoperatively only.

- I prescribe antibiotics postoperatively only.
  - I prescribe antibiotics preoperatively and postoperatively.
  - I do not perform this type of treatment.
- 2.2. Multiple implants:**
- I do not normally prescribe antibiotics for this procedure.
  - I prescribe antibiotics preoperatively only.
  - I prescribe antibiotics postoperatively only.
  - I prescribe antibiotics preoperatively and postoperatively.
  - I do not perform this type of treatment.
- 2.3. Immediate implant placement without the presence of chronic infection in the site of the tooth to be extracted:**
- I do not normally prescribe antibiotics for this procedure.
  - I prescribe antibiotics preoperatively only.
  - I prescribe antibiotics postoperatively only.
  - I prescribe antibiotics preoperatively and postoperatively.
  - I do not perform this type of treatment.
- 2.4. Immediate implant placement in the presence of chronic infection in the site of the tooth to be extracted:**
- I do not normally prescribe antibiotics for this procedure.
  - I prescribe antibiotics preoperatively only.
  - I prescribe antibiotics postoperatively only.
  - I prescribe antibiotics preoperatively and postoperatively.
  - I do not perform this type of treatment.
- 2.5. Transcrestal (atraumatic) sinus lift:**
- I do not normally prescribe antibiotics for this procedure.
  - I prescribe antibiotics preoperatively only.
  - I prescribe antibiotics postoperatively only.
  - I prescribe antibiotics preoperatively and postoperatively.
  - I do not perform this type of treatment.
- 2.6. Sinus lift with lateral window approach:**
- I do not normally prescribe antibiotics for this procedure.
  - I prescribe antibiotics preoperatively only.
  - I prescribe antibiotics postoperatively only.
  - I prescribe antibiotics preoperatively and postoperatively.
  - I do not perform this type of treatment.
- 2.7. Bone augmentation procedures (bone regeneration):**
- I do not normally prescribe antibiotics for this procedure.
  - I prescribe antibiotics preoperatively only.
  - I prescribe antibiotics postoperatively only.
  - I prescribe antibiotics preoperatively and postoperatively.
  - I do not perform this type of treatment.
- 2.8. Second stage implant surgery (uncovering implants prior to the beginning of the prosthetic phase):**
- I do not normally prescribe antibiotics for this procedure.
  - I prescribe antibiotics preoperatively only.
  - I prescribe antibiotics postoperatively only.
  - I prescribe antibiotics preoperatively and postoperatively.
  - I do not perform this type of treatment.
- 2.9. Making impressions for implant-supported prosthesis:**
- I do not normally prescribe antibiotics for this procedure.
  - I prescribe antibiotics preoperatively only.
  - I prescribe antibiotics postoperatively only.
  - I prescribe antibiotics preoperatively and postoperatively.
  - I do not perform this type of treatment.

**2.10. Placement of the implant-supported prosthesis:**

- I do not normally prescribe antibiotics for this procedure.
- I prescribe antibiotics preoperatively only.
- I prescribe antibiotics postoperatively only.
- I prescribe antibiotics preoperatively and postoperatively.
- I do not perform these types of treatments.

**3. Mark if any of the following risk factors trigger the prescription of antibiotics:**

**3.1. Smokers:**

- I do not normally prescribe antibiotics for this situation.
- I prescribe antibiotics preoperatively only.
- I prescribe antibiotics postoperatively only.
- I prescribe antibiotics preoperatively and postoperatively.
- I do not treat this type of patient.

**3.2. Diabetes mellitus:**

- I do not normally prescribe antibiotics for this situation.
- I prescribe antibiotics preoperatively only.
- I prescribe antibiotics postoperatively only.
- I prescribe antibiotics preoperatively and postoperatively.
- I do not treat this type of patient.

**3.3. Immunodeficiency states (antineoplastic treatments, lymphopenia, convalescence or recent postoperative period, etc.):**

- I do not normally prescribe antibiotics for this situation.
- I prescribe antibiotics preoperatively only.
- I prescribe antibiotics postoperatively only.
- I prescribe antibiotics preoperatively and postoperatively.
- I do not treat this type of patient.

**3.4. Psychiatric disorders:**

- I do not normally prescribe antibiotics for this situation.
- I prescribe antibiotics preoperatively only.
- I prescribe antibiotics postoperatively only.
- I prescribe antibiotics preoperatively and postoperatively.
- I do not treat this type of patient.

**3.5. Patients with a history of bacterial endocarditis or prosthetic heart valves:**

- I do not normally prescribe antibiotics for this situation.
- I prescribe antibiotics preoperatively only.
- I prescribe antibiotics postoperatively only.
- I prescribe antibiotics preoperatively and postoperatively.
- I do not treat this type of patient.

**3.6. Patients with a hip prosthesis:**

- I do not normally prescribe antibiotics for this situation.
- I prescribe antibiotics preoperatively only.
- I prescribe antibiotics postoperatively only.
- I prescribe antibiotics preoperatively and postoperatively.
- I do not treat this type of patient.

**Bloque III: Type of antibiotic of choice, dose and dosage of administration in healthy patients without allergies.**

**1. Do you routinely prescribe antibiotics preoperatively and prior to implant procedures?**

**1.1. How many days before surgery do you start antibiotic prophylaxis?**

- 2 days before.
- 1 day before.
- 1 hour before.
- Immediately before.

- I never do preoperative prophylaxis.
- 1.2. **If you have selected "1 or 2 days before", which antibiotic do you prescribe for a patient without allergies? (You can only select one type of antibiotic and one dose)**
- I do not perform preoperative prophylaxis "one or two days before".
  - *Amoxicillin*:
    - 500 mg, 2 times/day.
    - 500 mg, 3 times/day.
    - 750 mg, 2 times/day.
    - 750 mg, 3 times/day.
    - 1,000 mg, 2 times/day.
    - 1,000 mg, 3 times/day.
  - *Amoxicillin/ clavulanic acid*:
    - 875/ 125 mg, 2 times/day.
    - 875/ 125 mg, 3 times/day.
    - 500/ 125 mg, 2 times/day.
    - 500/ 125 mg, 3 times/day.
    - 250/ 62.5 mg, 3 times/day.
  - *Clindamycin*:
    - 150 mg, 4 times/day.
    - 300 mg, 4 times/day.
    - 300 mg, 3 times/day.
  - *Erythromycin*:
    - 400 mg, 4 times/day (ethylsuccinate).
    - 800 mg, 2 times/day (ethylsuccinate).
    - 250 mg, 4 times/day (stearate).
    - 500 mg, 2 times/day (stearate)
  - Azithromycin 500 mg, 1 time/day.
- 1.3. **If you have selected "one hour before" or "immediately before", which antibiotic do you prescribe in a patient without allergies? (You can only select one type of antibiotic and one dose).**
- I do not perform antibiotic prophylaxis "one hour before" or "immediately before" surgery.
  - *Amoxicillin*:
    - 3,000 mg.
    - 2,000 mg.
    - 1,000 mg.
    - 750 mg.
    - 500 mg.
  - *Amoxicillin/ clavulanic acid*:
    - 875/ 125 mg.
    - 500/ 125 mg.
    - 250/ 62.5 mg.
  - *Clindamycin*:
    - 600 mg.
    - 300 mg.
    - 150 mg.
  - *Erythromycin*:
    - 1,600 mg (ethylsuccinate).
    - 800 mg (ethylsuccinate).
    - 1,000 mg (stearate).
    - 500 mg (stearate).
  - *Azithromycin*:
    - 1,000 mg.
    - 500 mg.

2. Do you routinely prescribe antibiotics postoperatively for dental implant treatments in healthy patients??
- No.
  - Yes. If you have chosen this answer:
- 2.1. Which antibiotic do you prescribe in patients without allergies? (You can only select one type of antibiotic and one dose).
- I do not perform prophylaxis postoperatively.
  - *Amoxicillin*:
    - 250 mg, 4 times/day.
    - 500 mg, 3 times/day.
    - 750 mg, 2 times/day.
    - 750 mg, 3 times/day.
  - *Amoxicillin/ clavulanic acid*:
    - 500/ 125 mg, 2 times/day.
    - 500/125 mg, 3 times/day.
    - 875/ 125 mg, 2 times/day.
    - 875/ 125 mg, 3 times/day.
  - *Clindamycin*:
    - 150 mg, 4 times/day.
    - 300 mg, 3 times/day.
    - 300 mg, 4 times/day.
  - *Erythromycin*:
    - 400 mg, 4 times/day (ethylsuccinate).
    - 800 mg, 2 times/day (ethylsuccinate).
    - 250 mg, 4 times/day (stearate).
    - 500 mg, 2 times/day (stearate).
  - Azithromycin 500 mg, 1 time/day.
- 2.2. Duration of postoperative antibiotic treatment (in days):
- 1.
  - 2.
  - 3.
  - 5.
  - 7.
  - 10.
  - I do not perform postoperative prophylaxis.
3. In patients allergic to beta-lactams (such as penicillin), which preventive antibiotic do you usually use?
- Clindamycin.
  - Azithromycin.
  - Clarithromycin.
  - Erythromycin.

**Block IV: Factors affecting the decision to prescribe antibiotics.**

1. Which of the following factors affect the choice of antibiotic type and dosage of administration? (mark the degree of influence each factor has on your decision, with 1 being "none" and 5 being "very important")
- Patient preferences
  - Reading scientific material (articles, books, etc).
  - Knowledge acquired during dentistry/stomatology studies.
  - Knowledge acquired in postgraduate courses (specialisation courses, master's degree or doctorate).
  - Knowledge acquired in courses and congresses.
  - Cost of antibiotics.
  - Recommendations from other fellow professionals.
  - Previous experience with the antibiotic in a similar procedure.
  - Recommendations from a commercial firm.

- I don't think it makes any difference. Any antibiotic that the patient keeps at home may be useful.
